# Supplementary material for: Cation exchange improves the efficiency and stability of the n-doping of π-conjugated polymers
Source: Royal Society of Chemistry journal article supplement (doi:10.1039/d4ta03920c), 2024-01-01
Supplement: d4ta03920c1.pdf [file d4ta03920c1.pdf]

# Supporting Information

for

## Cation exchange improves the efficiency and stability of the n-doping of $\pi$ -conjugated polymers

*Jingyu Li*<sup>a</sup>, *Sihui Deng*<sup>b, c</sup>, *Junli Hu*<sup>a, \*</sup>, *Yichun Liu*<sup>a</sup>

<sup>a</sup> Key Laboratory of UV-Emitting Materials and Technology, Northeast Normal University, Ministry of Education, Changchun, Jilin, 130024, China

<sup>b</sup> State Key Laboratory of Polymer Physics and Chemistry, Changchun Institute of Applied Chemistry, Chinese Academy of Sciences, Changchun, Jilin, 130022, China

<sup>c</sup> University of Science and Technology of China, Hefei, Anhui, 230026, China

\* Corresponding author at [hujl100@nenu.edu.cn](mailto:hujl100@nenu.edu.cn).

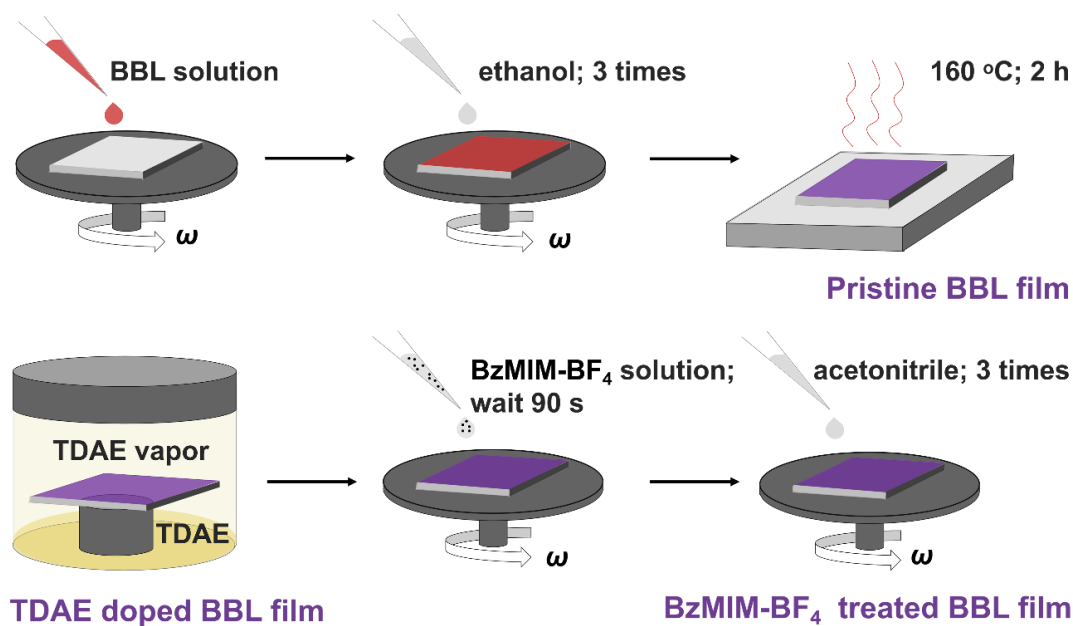

**Figure S1.** Schematic illustration of the processes of device fabrication.

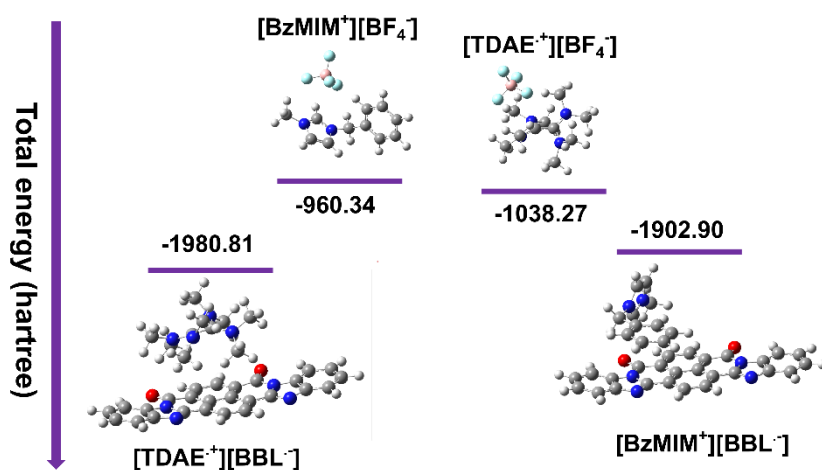

**Figure S2.** The optimized structures and total energy of different ion pairs. The total energy values for ion pairs as calculated using the B3LYP functional and the def2-SVP basis set.

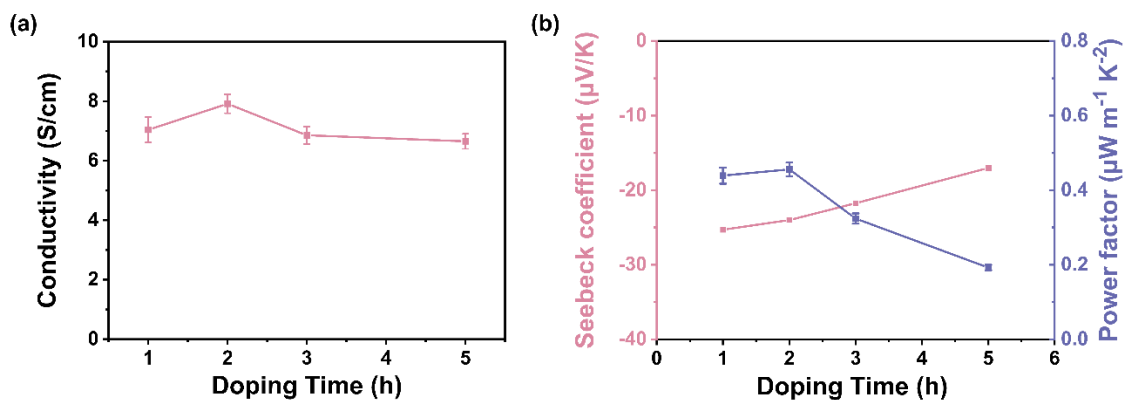

**Figure S3.** The effect of doping time of TDAE on (a) the conductivity and (b) the thermoelectric performance of the BBL film.

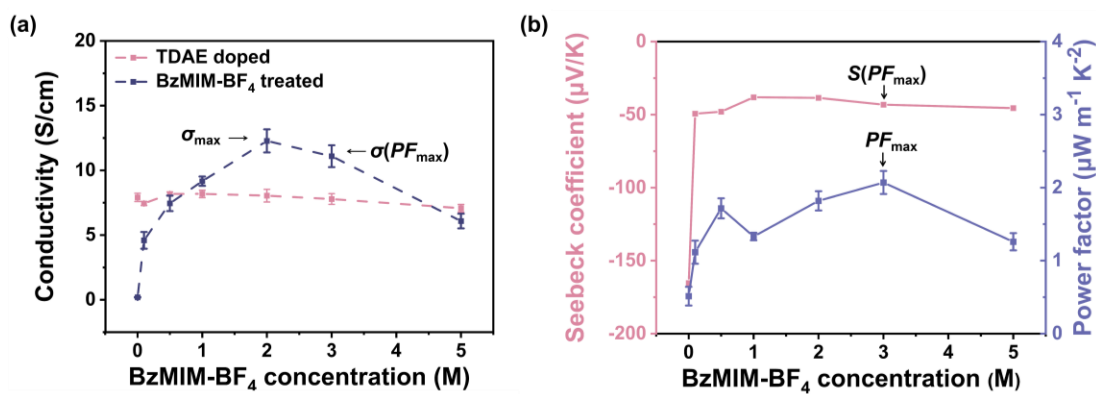

**Figure S4.** (a) Conductivity and (b) thermoelectric performance of the BBL films treated with BzMIM-BF<sub>4</sub> solution of different concentrations. The concentration of 0 M implies pure acetonitrile treatment.

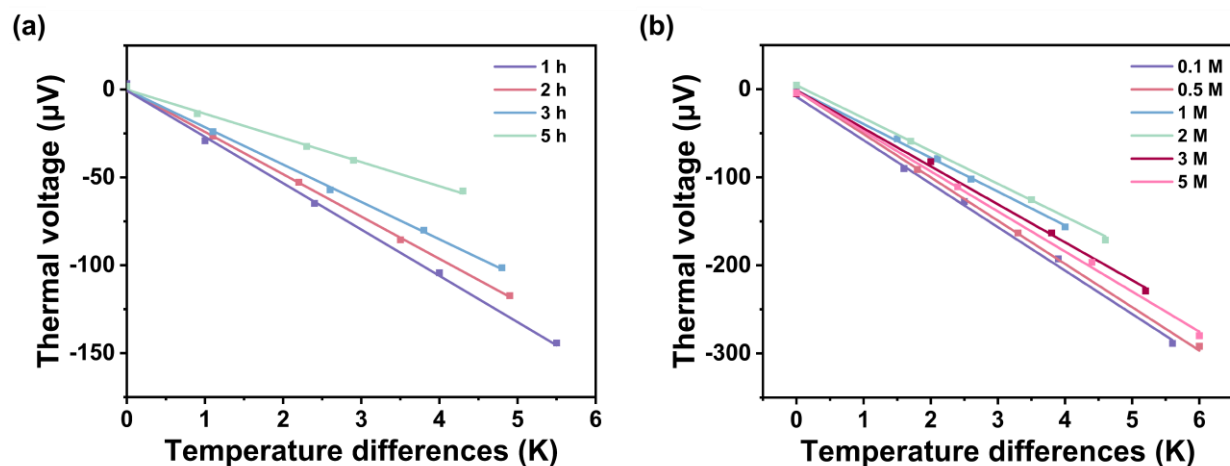

**Figure S5.** Temperature difference dependent thermal voltage of a) TDAE doped BBL films at different doping times and b) BzMIM- $\text{BF}_4$  treated BBL films at different concentrations.

**Table S1.** Summary of conductivity of BBL films reported in literatures.

| Polymer: dopant                 | Doping method     | $\sigma_{\text{max}}$ (S/cm) | Ref       |
|---------------------------------|-------------------|------------------------------|-----------|
| BBL: TDAE: BzMIM- $\text{BF}_4$ | Cation exchange   | 12.3                         | This work |
| BBL: N-DMBI                     | Sequential doping | 4.4                          | 32        |
|                                 | Sequential doping | 11.0                         | 47        |
| BBL: PEI                        | Blending doping   | 8.0                          | 40        |
| BBL: $\text{BV}^{++}$           | Sequential doping | 1.6                          | 44        |
| BBL: P(g42T-T)                  | Blending doping   | 0.2                          | 42        |
| BBL: TDAE                       | Vapor doping      | 1.7                          | 39        |

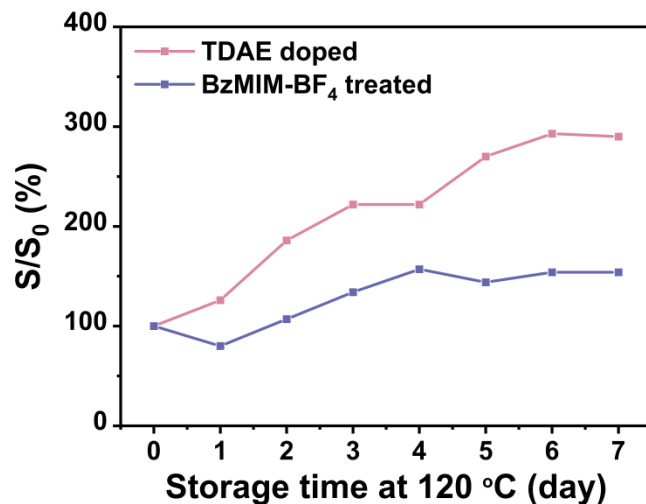

**Figure S6.** The change of the normalized Seebeck coefficient of the TDAE doped and BzMIM-BF<sub>4</sub> treated BBL films during the storage at 120 °C under nitrogen atmosphere.

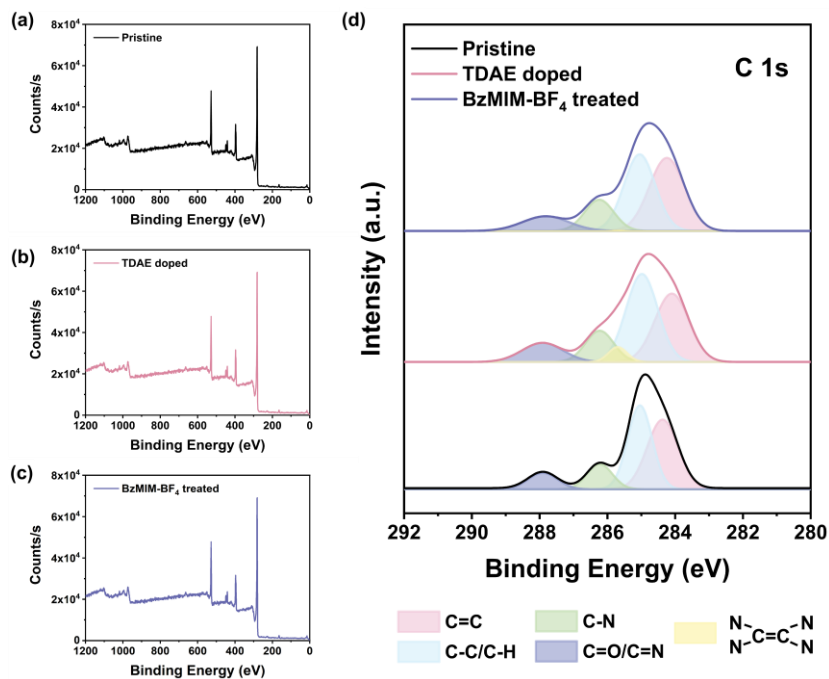

**Figure S7.** The XPS spectra of the (a) pristine, (b)TDAE doped and (c) BzMIM-BF<sub>4</sub> treated BBL films.

(d)The XPS spectra analysis of C 1s for the pristine, TDAE doped and BzMIM-BF<sub>4</sub> treated BBL films.

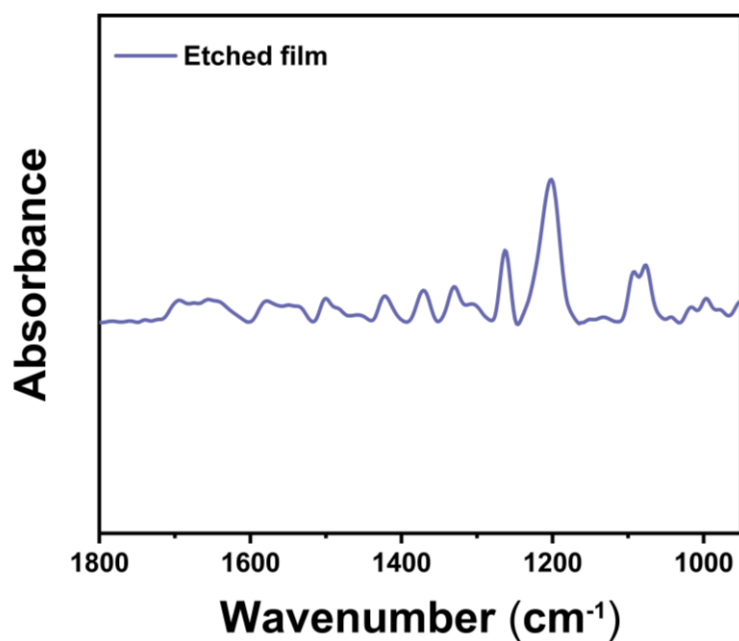

**Figure S8.** The FTIR spectra of BzMIM-BF<sub>4</sub> treated BBL film etched by nitrogen plasma. The thickness of the etched film was 28 nm.

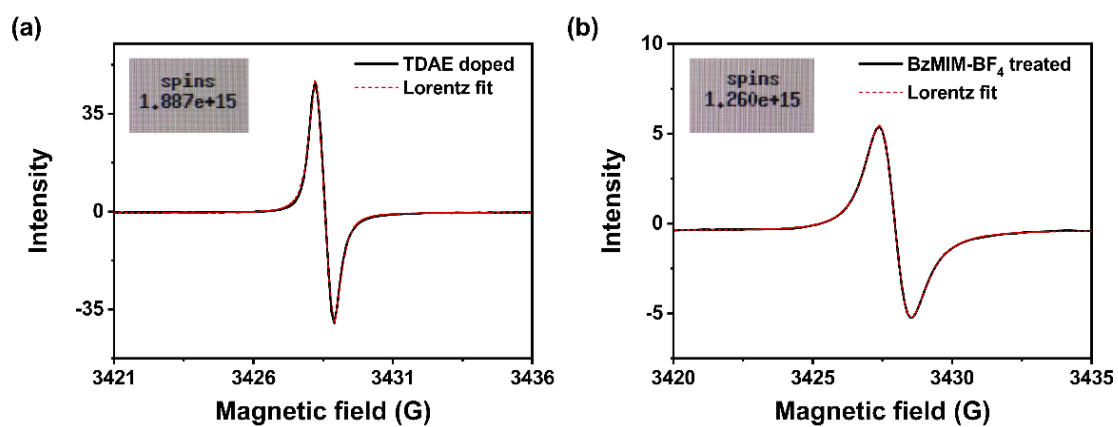

**Figure S9.** The spins calculation and the Lorentz fit of EPR curves of (a) the TDAE doped and (b) the BzMIM-BF<sub>4</sub> treated BBL films.

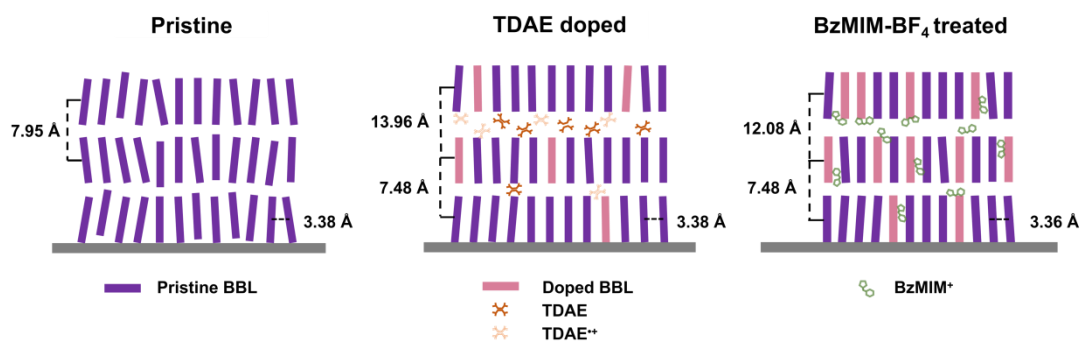

**Figure S10.** Schematic illustration of the microstructure of the BBL films.

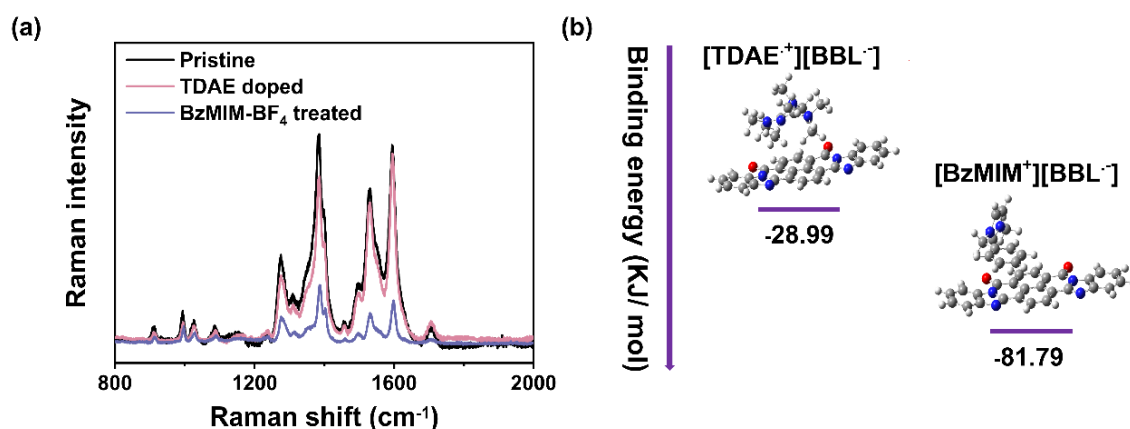

**Figure S11.** (a) The Raman spectra of the BBL films. (b) The binding energy between different cations and polarons.

**Table S2.** The GIWAXS analysis of the pristine, TDAE doped and BzMIM-BF<sub>4</sub> treated BBL films.

Coherence length, and paracrystallinity in in-plane (010) diffraction.

| Sample                                 | Coherence length (Å) | Paracrystallinity (%) |
|----------------------------------------|----------------------|-----------------------|
| Pristine BBL film                      | 35.12                | 3.43                  |
| TDAE doped BBL film                    | 44.87                | 3.04                  |
| BzMIM-BF <sub>4</sub> treated BBL film | 43.83                | 3.05                  |
